# Supplementary figures and images for: Gold nanoparticle synthesis in worm-like catanionic micelles: microstructure conservation and temperature induced recovery
Source: Royal Society of Chemistry journal article supplement (doi:10.1039/b816427d), 2008-12-17

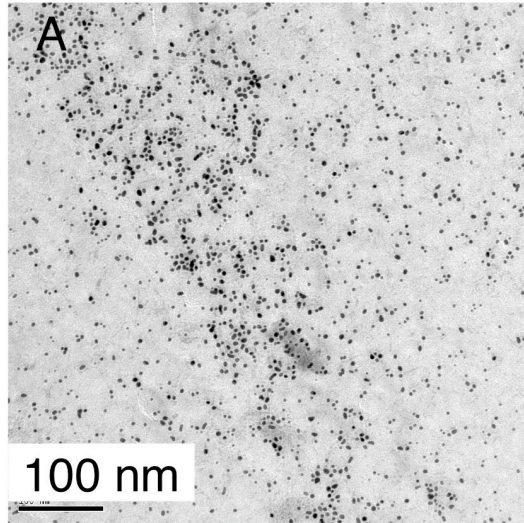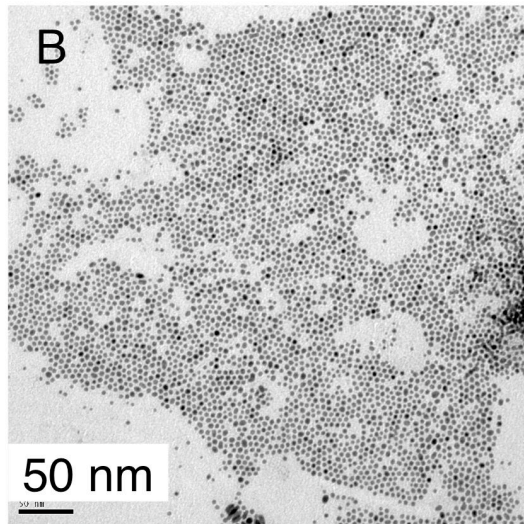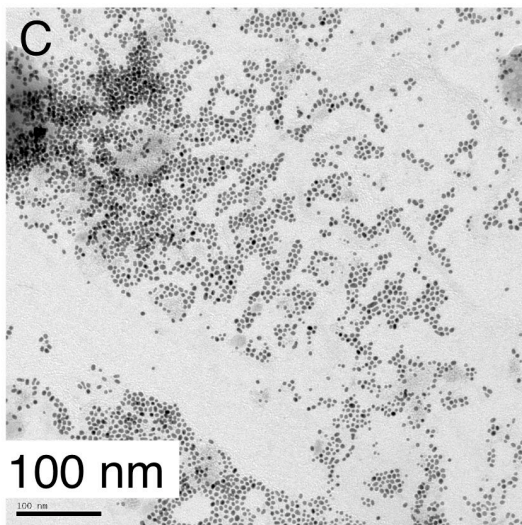

Figure 1: Supplementary TEM images of gold nanoparticles : A)  $R_w=1$ ,  $h = 10$ ; B)  $R_w=2$ ,  $h = 10$ ; C)  $R_w=2$ ,  $h = 5$ .

Supplement: b816427d.pdf [file b816427d.pdf]
